# Supplementary material for: Identification of One O-Methyltransferase Gene Involved in Methylated Flavonoid Biosynthesis Related to the UV-B Irradiation Response in Euphorbia lathyris
Source: MDPI journal article supplement (doi:10.3390/ijms25020782), 2024-01-08
Supplement: s1 [file s1]

## Supporting Information 1

Table S1 Statistics of output of the RNA-Seq

| Sample     | Raw reads  | Raw bases     | Clean reads | Clean bases   | Q20_rate | Q30_rate | GC_rate |
|------------|------------|---------------|-------------|---------------|----------|----------|---------|
| ELC-UV0h-1 | 57,881,318 | 8,682,197,700 | 57,637,084  | 8,538,910,053 | 97.36%   | 92.52%   | 42.57%  |
| ELC-UV0h-2 | 42,771,148 | 6,415,672,200 | 42,551,148  | 6,296,614,517 | 97.31%   | 92.48%   | 42.56%  |
| ELC-UV0h-3 | 39,507,428 | 5,926,114,200 | 39,339,862  | 5,840,390,302 | 97.91%   | 93.64%   | 42.49%  |
| ELC-UV3h-1 | 43,008,738 | 6,451,310,700 | 42,808,178  | 6,347,717,512 | 98.02%   | 93.96%   | 42.83%  |
| ELC-UV3h-2 | 44,155,052 | 6,623,257,800 | 43,973,208  | 6,519,701,416 | 98.01%   | 93.89%   | 42.72%  |
| ELC-UV3h-3 | 42,603,226 | 6,390,483,900 | 42,408,872  | 6,275,545,845 | 97.94%   | 93.75%   | 42.24%  |

Note: ELC-UV0h, the callus of *E. lathyris* was not exposed to UV-B irradiation; ELC-UV3h, the callus of *E. lathyris* were exposed to UV-B irradiation for 3h.

Table S2. GenBank accession numbers of MT proteins from other plants in Figure 3B

| Genes      | Species                            | Accession number |
|------------|------------------------------------|------------------|
| ElOMT1     | <i>Euphorbia lathyris</i>          | OR902769         |
| BrF3'OMT   | <i>Brassica rapa</i>               | XP_009132451     |
| ObFOMT1    | <i>Ocimum basilicum</i>            | AFU50295.1       |
| AtOMT1     | <i>Arabidopsis thaliana</i>        | AAB96879.1       |
| HvOMT1     | <i>Hordeum vulgare</i>             | ABQ58825.1       |
| ChOMT      | <i>Medicago sativa</i>             | AAB48059.1       |
| CrOMT2     | <i>Catharanthus roseus</i>         | Q8GSN1           |
| ZmOMT1     | <i>Zea mays</i>                    | ABQ58826.1       |
| TaCOMT1    | <i>Triticum aestivum</i>           | Q84N28.1         |
| HvF7OMT    | <i>Hordeum vulgare</i>             | CAA54616.1       |
| CdFOMT5    | <i>Citrus depressa</i>             | BAU51794.1       |
| PsOMT1     | <i>Pinus sylvestris</i>            | AQX17825.1       |
| CaOMT2     | <i>Citrus aurantium</i>            | ADK97702.1       |
| PfOMT3     | <i>Perilla frutescens</i>          | QOE76460.1       |
| GmIOMT1    | <i>Glycine max</i>                 | NP_001353843.1   |
| IiOMT3     | <i>Isatis tinctoria</i>            | WET17731.1       |
| PaCCoAOMT1 | <i>Polypodiodes amoena</i>         | QCY65250.1       |
| ZvCCoAOMT  | <i>Zinnia violacea</i>             | AAA59389.1       |
| GISOMT9    | <i>Glycine max</i>                 | NP_001236240.1   |
| AnthOMT    | <i>Solanum lycopersicon</i>        | NP_001289828.1   |
| EpCCoAOMT  | <i>Euphorbia peplus</i>            | WCJ17706.1       |
| PaMTH1     | <i>Podospora anserina</i>          | 4QVK_A           |
| SbCCoAOMT  | <i>Sorghum bicolor</i>             | 5KVA_A           |
| ClOMT      | <i>Curcuma longa</i>               | UXX21556.1       |
| IiOMT1     | <i>Isatis tinctoria</i>            | WET17729.1       |
| IiOMT2     | <i>Isatis tinctoria</i>            | WET17730.1       |
| AaCCoAOMT  | <i>Artemisia annua</i>             | PWA69367.1       |
| HmOMT1     | <i>Haplomitrium mnioides</i>       | QCG81601.1       |
| PaF6OMT    | <i>Plagiochasma appendiculatum</i> | APX42106.1       |
| MeOMT1     | <i>Marchantia emarginata</i>       | QCG81600.1       |
| MpOMT      | <i>Mucuna pruriens</i>             | RDX82993.1       |

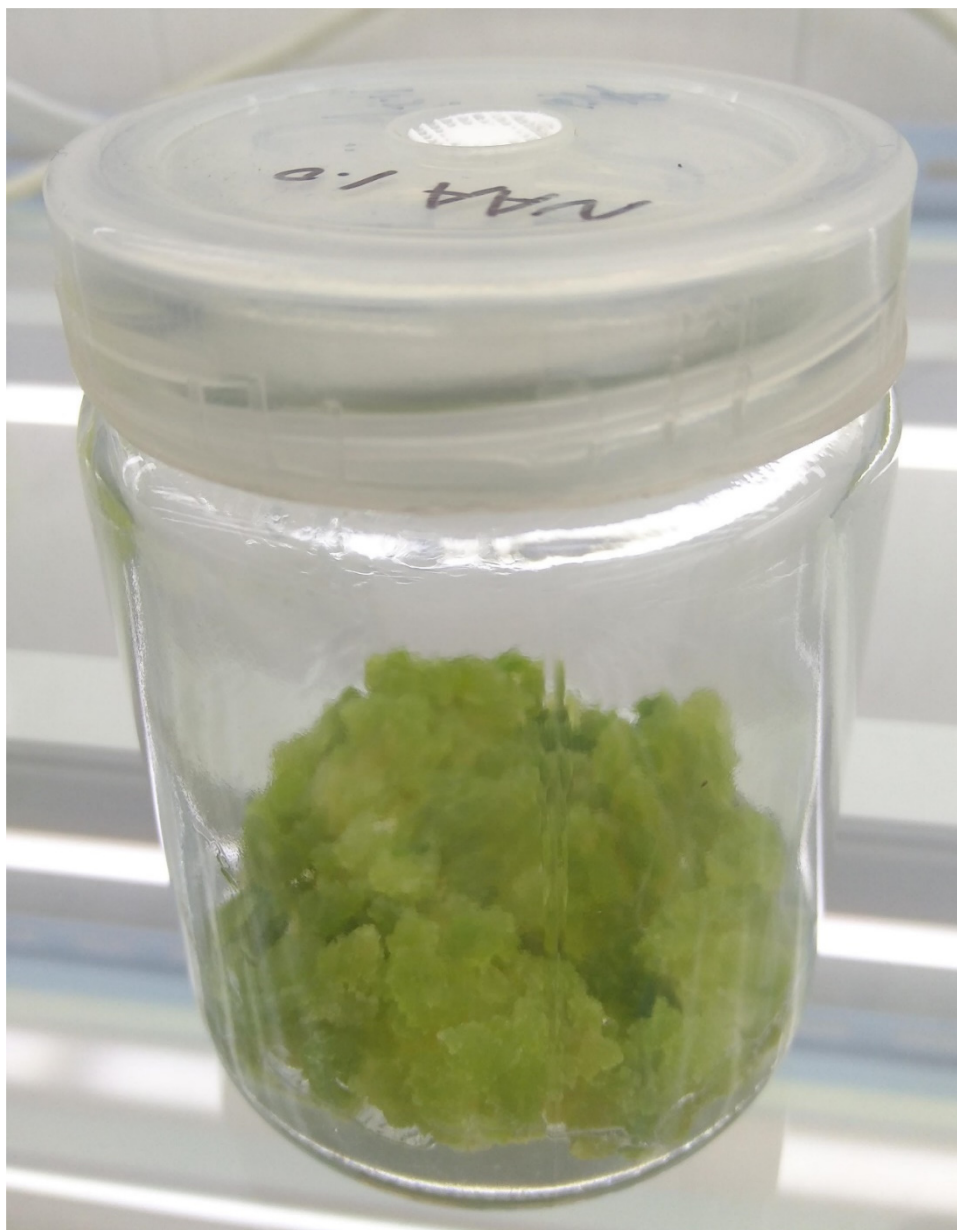

Figure S1 Picture of *E. lathyris* callus
